# Supplementary material
Source: HighWire-hosted journal article supplement (https://bmjopenquality.bmj.com/highwire/filestream/135968/field_highwire_adjunct_files/0/ds5375.docx)
Supplement: ds5375.docx [file ds5375.docx]

**CAUTI COUNT**

**CAUTI RATE**
